# Supplementary material for: Wogonin and related natural flavones are inhibitors of CDK9 that induce apoptosis in cancer cells by transcriptional suppression of Mcl-1
Source: PubMed Central journal article supplement — Cell Death Dis. 2011 Jul 21;2(7):e182–. doi: 10.1038/cddis.2011.66 (PMC3199715; doi:10.1038/cddis.2011.66), 2011-07-21
Supplement: cddis201166x2.pdf [file cddis201166x2.pdf]

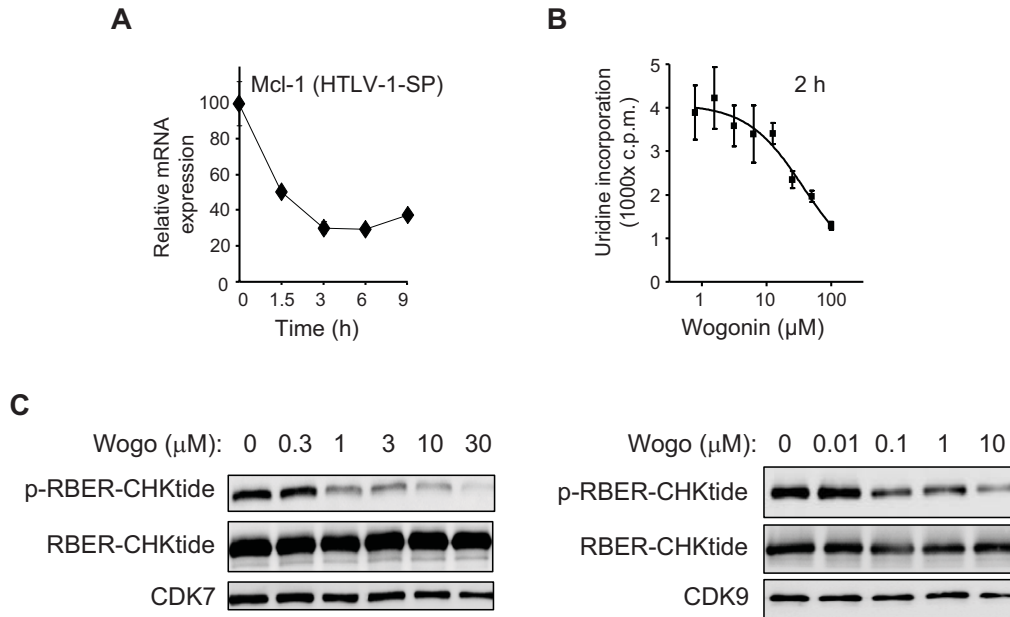

**Figure S2. Wogonin is a naturally occurring inhibitor of CDK7 and CDK9.**

A. Wogonin down-regulates Mcl-1 mRNA expression in malignant cells. HTLV-1-SP cells were treated with 50 μM Wogonin for indicated time periods. Mcl-1 mRNA expression levels were examined by real-time PCR. Means ± SD are shown. Data are representative of three independent experiments performed in triplicates. B. Wogonin suppresses RNA synthesis in malignant cells. CEM cells were treated with different concentrations of Wogonin for 2 h as indicated. RNA synthesis was measured by [<sup>3</sup>H]-uridine-incorporation. Means ± SD are shown. Data are representative of two independent experiments performed in triplicates. C. Wogonin inhibits CDK7 and CDK9 kinase activity determined by Western blot analysis. CDK7/cyclinH/MAT1 or CDK9/cyclinT was incubated with recombinant substrate RBER-CHKtide in the presence of different concentrations of Wogonin. The amount of phosphorylated substrate was determined by Western blot using phospho-specific antibodies. Results are representative of two independent experiments.
