# Supplementary material for: Wogonin and related natural flavones are inhibitors of CDK9 that induce apoptosis in cancer cells by transcriptional suppression of Mcl-1
Source: PubMed Central journal article supplement — Cell Death Dis. 2011 Jul 21;2(7):e182–. doi: 10.1038/cddis.2011.66 (PMC3199715; doi:10.1038/cddis.2011.66), 2011-07-21
Supplement: cddis201166x3.pdf [file cddis201166x3.pdf]

**A**

MG-132 ( $\mu\text{M}$ ): 0 0 0.5 0.5  
Wogonin ( $\mu\text{M}$ ): 0 50 0 50

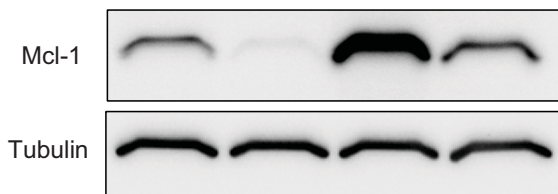**B**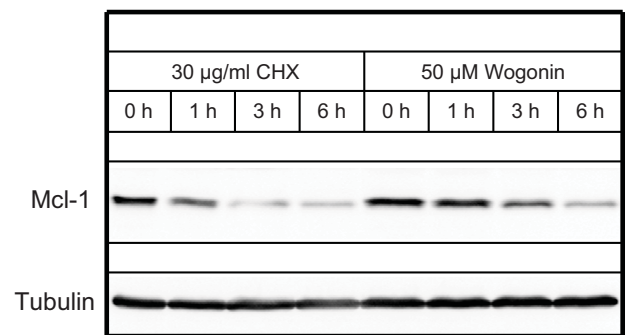

**Figure S3. The effect of Wogonin on Mcl-1 is largely independent of proteasomal degradation.**

A. Leukemic SP cells were treated with 50  $\mu\text{M}$  Wogonin in the absence or the presence (pre-incubation for 0.5 h) of 0.5  $\mu\text{M}$  MG-132. After 8 h treatment, cell lysates were subjected to Western blot analysis. B. CEM cells were treated with cycloheximide (CHX) or Wogonin for different time periods. Cell lysates were subjected to Western blot analysis. Data are representative of two independent experiments.
