# Supplementary material for: Wogonin and related natural flavones are inhibitors of CDK9 that induce apoptosis in cancer cells by transcriptional suppression of Mcl-1
Source: PubMed Central journal article supplement — Cell Death Dis. 2011 Jul 21;2(7):e182–. doi: 10.1038/cddis.2011.66 (PMC3199715; doi:10.1038/cddis.2011.66), 2011-07-21
Supplement: cddis201166x4.pdf [file cddis201166x4.pdf]

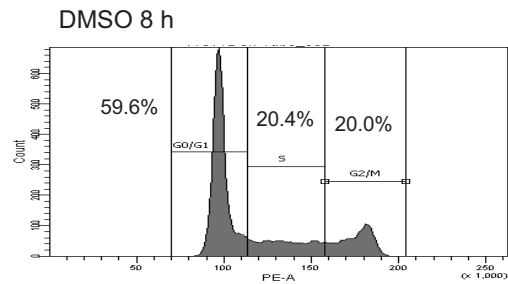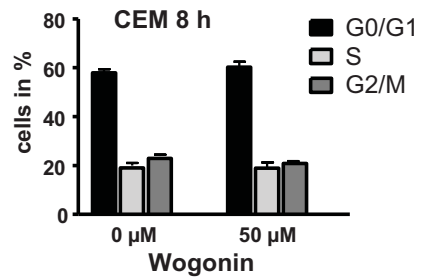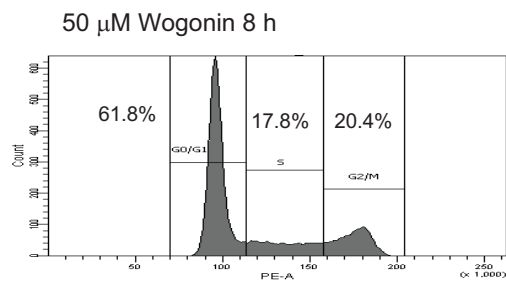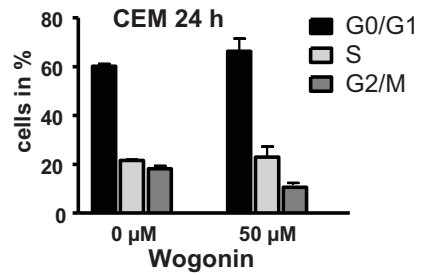

**Figure S4. Wogonin does not block cell cycle progression.**

Leukemic CEM cells were treated with 50 μM Wogonin or the solvent DMSO for indicated time periods. The cell cycle distribution was determined using FACS.
