# Supplementary material for: Wogonin and related natural flavones are inhibitors of CDK9 that induce apoptosis in cancer cells by transcriptional suppression of Mcl-1
Source: PubMed Central journal article supplement — Cell Death Dis. 2011 Jul 21;2(7):e182–. doi: 10.1038/cddis.2011.66 (PMC3199715; doi:10.1038/cddis.2011.66), 2011-07-21
Supplement: cddis201166x5.pdf [file cddis201166x5.pdf]

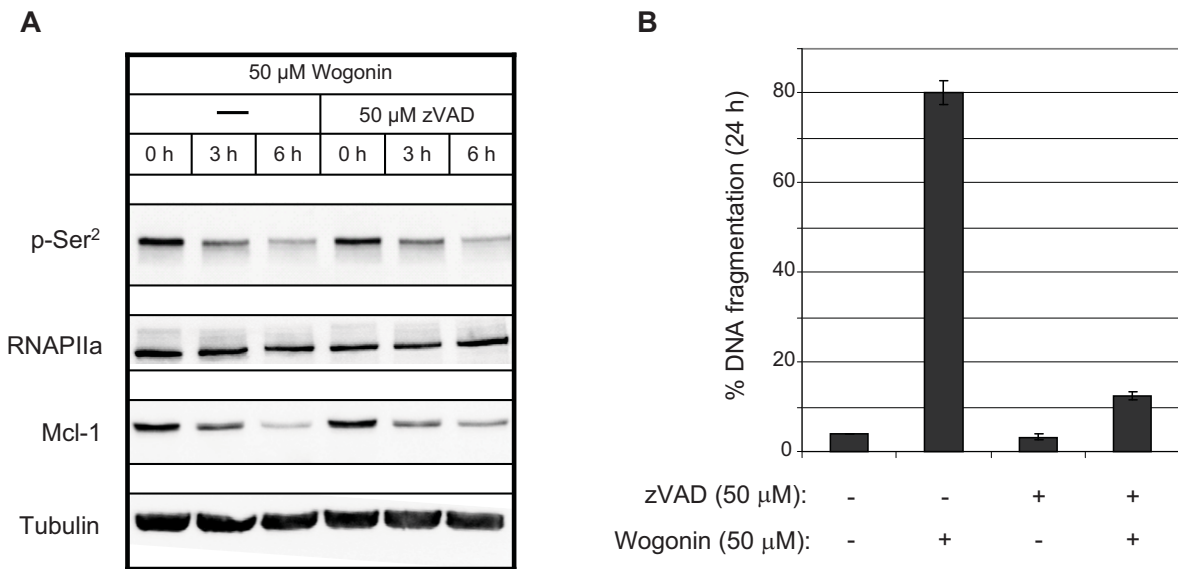

**Figure S5. The pan-caspase inhibitor zVAD inhibits Wogonin-induced apoptosis but not Wogonin-mediated inhibition of RNAPII phosphorylation and Mcl-1 expression.**

A. CEM cells were treated with 50  $\mu$ M Wogonin in the absence or the presence of 50  $\mu$ M zVAD-FMK (pre-incubated for 0.5 h). The effects of Wogonin on phosphorylation of RNAPII and Mcl-1 expression were analyzed by Western blot after 3 and 6 h treatment. B. Apoptotic cell death was determined by DNA fragmentation 24 h after Wogonin treatment. Means  $\pm$  SD are shown.
